# Supplementary material for: Targeted cortical reorganization using optogenetics in non-human primates
Source: eLife journal article supplement (doi:10.7554/elife.31034), 2018-05-29
Supplement: supp [file TableSupplement2.xlsx]

## Sheet: Sheet1
Evoked Response Measure	Change in Connectivity during Control Sessions	Change in Connectivity during Long Latency Stim Sessions	Change in Connectivity in Control Sessions Vs. Change in Connectivity in Stim Sessions	Correlation Between Coherence (Across Freqs) and Evoked Response Connectivity Measure
high gamma amplitude	p=1	p=1.6e-04	p=6.6e-03	p=3.7e-06
high gamma energy	p=.38	p=3.3e-03	p=0.184	p=0.144
broadband energy	p=.22	p=5.4e-04	p=0.386	p=0.652
broadband amplitude	p=.30	p=4.6e-04	p=0.184	p=0.002
broadband slope	p=.22	p=4.6e-04	p=0.184	p=0.318
