# Supplementary material for: Targeted cortical reorganization using optogenetics in non-human primates
Source: eLife. 2018 May 29;7:e31034. doi: 10.7554/eLife.31034 (PMC5986269; doi:10.7554/eLife.31034)
Supplement: Supplementary file 1. [file elife-31034-supp1.xlsx]

## Sheet: Sheet1
Figure	Panel	Description	Statistical Test	N	p-value	proportion of significant p-values (p<.05)	Additional Inclusion/Exclusion Criteria
3	B	example regression btw SERR & Theta Coherence	Linear Regression	39	3.3e-11
3	C	summary of regressions btw SERR & Theta Coherence at beginning of experiments	Linear Regression (proportion of significant regressions)	56		0.69
		summary of regressions btw SERR & Theta Coherence: test if slopes are significantly different from 0	t-test (paired)	56	3.73e-06
4	B	example session: final SERR vs. initial SERR	t-test (paired)	38	3.88e-11
4	C	All sessions: final SERR vs. initial SERR	t-test (paired)
		MonkeyG		38	3.88e-11
		MonkeyG		37	9.72e-12
		MonkeyG		33	8.84e-17
		MonkeyG		30	0.00036
		MonkeyG		68	0.0605
		MonkeyG		33	0.0453
		MonkeyG		38	2.03e-13
		MonkeyG		36	3.29e-14
		MonkeyG		45	4.67e-19
		MonkeyJ		69	1.08e-11
		MonkeyJ		51	0.143
		MonkeyJ		35	1.91e-15
		MonkeyJ		46	0.247
		MonkeyJ		40	4.69e-25
		MonkeyJ		50	0.181
		MonkeyJ		41	6.98e-26
		MonkeyJ		25	3.83e-08
		MonkeyJ		33	5.1e-09
		MonkeyJ		38	1.36e-05
4	D	final SERR vs initial SERR: broken down by…					exluded sessions with photoelectric artifact on stim site
		control experiments	t-test (paired)	7	0.8		included single-site controls
		laser in S1	t-test (paired)	6	0.01
		laser in M1	t-test (paired)	13	0.00016
		controls vs all stim	t-test (unpaired)	7 vs 19	0.0036
4	E	example session: final theta coh vs. initial theta coh	t-test (paired)	38	0.03
4	F	All sessions: final theta coh vs. initial theta coh	t-test (paired)
		MonkeyG		38	0.00296
		MonkeyG		33	0.000117
		MonkeyG		30	0.00103
		MonkeyG		68	0.00351
		MonkeyG		33	0.000193
		MonkeyG		38	0.00148
		MonkeyG		35	1.21e-09
		MonkeyG		45	2.88e-18
		MonkeyJ		69	1.57e-25
		MonkeyJ		51	5.69e-07
		MonkeyJ		35	0.00086
		MonkeyJ		46	0.00158
		MonkeyJ		50	4.57e-07
		MonkeyJ		41	2.87e-06
		MonkeyJ		25	0.0111
		MonkeyJ		33	4.02e-05
		MonkeyJ		25	0.00226
		MonkeyJ		38	8.98e-05
4	G	change in coherence across freq bands (Bonferroni corrected)	t-test (unpaired, p*#freqs)	5 controls, 20 stim expts			excluded single-site controls
		0-4Hz		5 controls, 20 stim expts	3.4
		4-8Hz		5 controls, 20 stim expts	0.017
		8-12Hz		5 controls, 20 stim expts	0.29
		12-16Hz		5 controls, 20 stim expts	0.15
		16-20Hz		5 controls, 20 stim expts	3.3
		20-24Hz		5 controls, 20 stim expts	1.1
		24-28Hz		5 controls, 20 stim expts	1.7
		28-32Hz		5 controls, 20 stim expts	10
		32-36Hz		5 controls, 20 stim expts	1.3
		36-40Hz		5 controls, 20 stim expts	0.42
		40-44Hz		5 controls, 20 stim expts	2.2
		44-48Hz		5 controls, 20 stim expts	11
		48-52Hz		5 controls, 20 stim expts	0.23
		52-56Hz		5 controls, 20 stim expts	1.6
		56-60Hz		5 controls, 20 stim expts	5.4
4	H	summary of regressions btw ERR & Coherence broken down by...	Linear Regressions (proportion of significant regressions)				included all experiments (regardless of latency between lasers)
		Initial		56		0.69
		Final		56		0.58
		Delta		56		0.46
		summary of regressions btw ERR & Coherence: test if slopes are significantly different from 0	t-test (paired)
		Initial		56	3.7e-06
		Final		56	0.018
		Delta		56	0.85
		summary of 'no stim' vs 'stim': was the change in slope different in the 'no stim' vs 'stim' conditions? Calculated median initial and final slope across 4Hz freq bands from 0-60Hz (i.e., 0-4Hz, 4-8Hz,… 56-60Hz) then performed test on difference within each freq band.	t-test (paired)	15 freq bands	0.0025
5	B	Test of Stability: Is the ERR significantly different between the end of the conditioning block and the following test block?					exluded sessions with photoelectric artifact on stim site
		after block1	t-tests (paired)	19	0.11
		after block2	t-tests (paired)	19	0.87
		after block3	t-tests (paired)	19	0.032
		after block4	t-tests (paired)	19	0.093
		after block5	t-tests (paired)	19	0.0002
		after all blocks	t-tests (paired)	19*5	2.9e-05
S5	A	change in Normalized Power across freq bands (Bonferroni corrected)	t-test (unpaired, p*#freqs)	5 controls, 20 stim expts
		0-4Hz		5 controls, 20 stim expts	13.33
		4-8Hz		5 controls, 20 stim expts	14.78
		8-12Hz		5 controls, 20 stim expts	3.77
		12-16Hz		5 controls, 20 stim expts	8.92
		16-20Hz		5 controls, 20 stim expts	5.65
		20-24Hz		5 controls, 20 stim expts	4.72
		24-28Hz		5 controls, 20 stim expts	12.9
		28-32Hz		5 controls, 20 stim expts	7.17
		32-36Hz		5 controls, 20 stim expts	2.04
		36-40Hz		5 controls, 20 stim expts	5.1
		40-44Hz		5 controls, 20 stim expts	1.82
		44-48Hz		5 controls, 20 stim expts	2.69
		48-52Hz		5 controls, 20 stim expts	7.02
		52-56Hz		5 controls, 20 stim expts	2.64
		56-60Hz		5 controls, 20 stim expts	5.65
	B	change in Stim Channel Power across freq bands (Bonferroni corrected)	t-test (unpaired, p*#freqs)	5 controls, 20 stim expts
		0-4Hz		5 controls, 20 stim expts	12.61
		4-8Hz		5 controls, 20 stim expts	4.33
		8-12Hz		5 controls, 20 stim expts	11.59
		12-16Hz		5 controls, 20 stim expts	1.63
		16-20Hz		5 controls, 20 stim expts	8.31
		20-24Hz		5 controls, 20 stim expts	9.95
		24-28Hz		5 controls, 20 stim expts	7.13
		28-32Hz		5 controls, 20 stim expts	13.66
		32-36Hz		5 controls, 20 stim expts	12.46
		36-40Hz		5 controls, 20 stim expts	9.73
		40-44Hz		5 controls, 20 stim expts	13.94
		44-48Hz		5 controls, 20 stim expts	11.72
		48-52Hz		5 controls, 20 stim expts	14.32
		52-56Hz		5 controls, 20 stim expts	9.3
		56-60Hz		5 controls, 20 stim expts	9.09
	C	change in Secondary Channel Power across freq bands (Bonferroni corrected)	t-test (unpaired, p*#freqs)	5 controls, 20 stim expts
		0-4Hz		5 controls, 20 stim expts	8.17
		4-8Hz		5 controls, 20 stim expts	2.19
		8-12Hz		5 controls, 20 stim expts	2.17
		12-16Hz		5 controls, 20 stim expts	0.13
		16-20Hz		5 controls, 20 stim expts	0.68
		20-24Hz		5 controls, 20 stim expts	1.21
		24-28Hz		5 controls, 20 stim expts	4.81
		28-32Hz		5 controls, 20 stim expts	6.15
		32-36Hz		5 controls, 20 stim expts	4.95
		36-40Hz		5 controls, 20 stim expts	2.51
		40-44Hz		5 controls, 20 stim expts	3.95
		44-48Hz		5 controls, 20 stim expts	6.24
		48-52Hz		5 controls, 20 stim expts	8.09
		52-56Hz		5 controls, 20 stim expts	7.56
		56-60Hz		5 controls, 20 stim expts	13.34
6	B	Example Long Latency Session for Hebbian Analysis	Linear Regression	1891	7.1e-195
	C	Summary Data of Long Latency Hebbian Analysis	Linear Regression: proportion of significant (p<.05) blocks/regressions	105		0.96
	C	Summary Data of Long Latency Hebbian Analysis	t-test: distribution of regression slopes	105	2.41e-19
	C	Summary Data of Long Latency Hebbian Analysis	ranksum test btw slopes in the 'no stim' and 'stim' conditions (i.e., are the slopes that we get in the 'stim' condition larger than the 'no stim' condition? )	20 control blocks, 105 long latency stim blocks	0.048
	C	Summary Data of Long Latency Hebbian Analysis	ranksum test btw r^2 values in the 'no stim' and 'stim' conditions (i.e., are the r^2 values that we get in the 'stim' condition larger than the 'no stim' condition? )	20 control blocks, 105 long latency stim blocks	0.013
7	D	Summary Data of Short Latency Hebbian Analysis	Linear Regression: proportion of significant (p<.05) blocks/regressions	170		0.94
	D	Summary Data of Long Latency Hebbian Analysis	t-test: distribution of regression slopes	170	1.37e-28
7_S1		Example Short Latency Session of Hebbian Analysis	Linear Regression
7_S2		Summary Data of Short Latency Hebbian Analysis	ranksum test btw slopes in the 'no stim' and 'stim' conditions (i.e., are the slopes that we get in the 'stim' condition larger than the 'no stim' condition? )	20 control blocks, 170 short latency stim blocks	0.037
		Summary Data of Short Latency Hebbian Analysis	ranksum test btw r^2 values in the 'no stim' and 'stim' conditions (i.e., are the r^2 values that we get in the 'stim' condition larger than the 'no stim' condition? )	20 control blocks, 170 short latency stim blocks	0.006
Table_S2	A	Summary Data: test on change in connectivity between 'no stim' and 'stim' conditions broken down by measure	Ranksum	7 controls, 19 stim
		high gamma energy			0.184
		broadband energy			0.386
		broadband amplitude			0.184
		broadband slope			0.184
	B	Summary Data: test on correlation between coherence and connectivity measure based on evoked responses in 'no stim' and 'stim' conditions broken down by measure	t-test on slopes (sig different from 0)	7 controls, 19 stim
		high gamma energy			0.144
		broadband energy			0.652
		broadband amplitude			0.002
		broadband slope			0.318
Not used in paper		Summary Data: Change in measured primary-to-secondary delay of evoked responses	t-test	7 controls, 19 stim	0.23
Not used in paper	A	Linear relationship between initial SERR and distance to site of stimulation	t-test on linear regression values	19	0.065
Not used in paper	B	Linear relationship between change in SERR and distance to site of stimulation	t-test on linear regression values	19	0.35
S7	B	Example Short Latency Session for Hebbian Analysis	Linear Regression	1953	1.01e-117
S8		summary of regressions btw ERR & Coherence broken down by...	Linear Regressions (proportion of significant regressions)				included control ('no stim') experiments
		Initial		5		0.78
		Final		5		0.38
		Delta		5		0.37
		summary of regressions btw ERR & Coherence: test if slopes are significantly different from 0	t-test (paired)
		Initial		5	0.031
		Final		5	0.14
		Delta		5	0.38
S9		Summary Data of No Stim Hebbian Analysis	Linear Regression: proportion of significant (p<.05) blocks/regressions	20		0.85
