# Supplementary figures and images for: Targeted cortical reorganization using optogenetics in non-human primates
Source: eLife journal article supplement (doi:10.7554/elife.31034), 2018-05-29

Figure 7-Figure Supplement 2

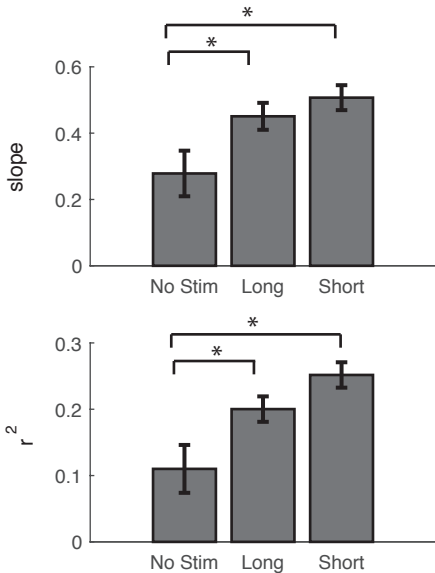

Supplement: supp [file elife-31034-supp-v1.zip]

Figure 4-Figure Supplemet 1

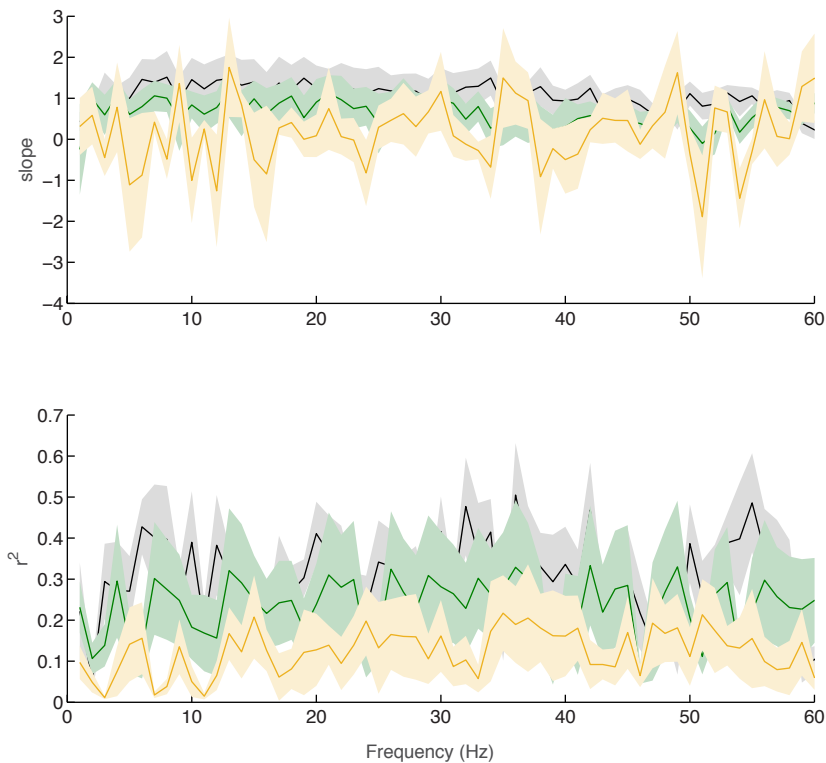

Supplement: supp [file elife-31034-supp-v1.zip]

Figure 7-Figure Supplement 1

A

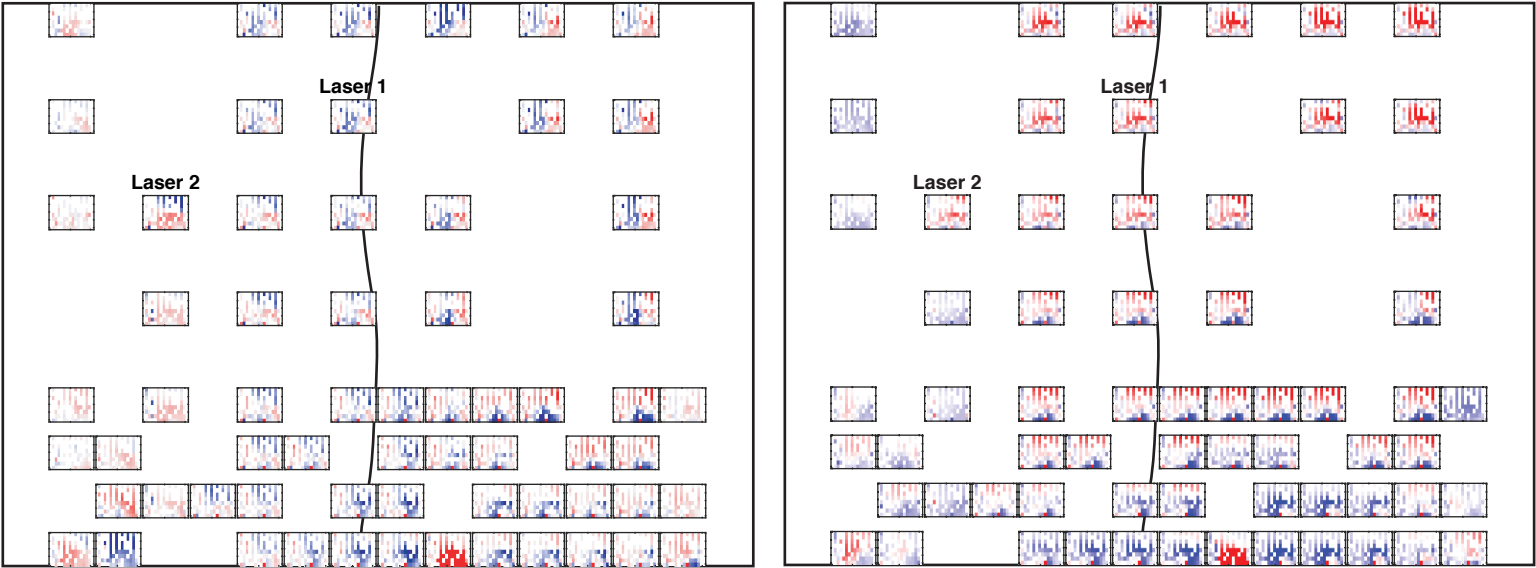

B

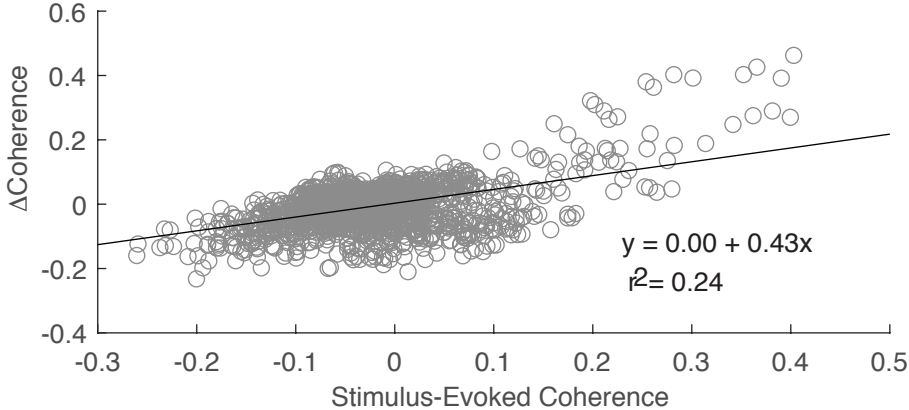

Supplement: supp [file elife-31034-supp-v1.zip]

Figure 1-Figure Supplemet 1

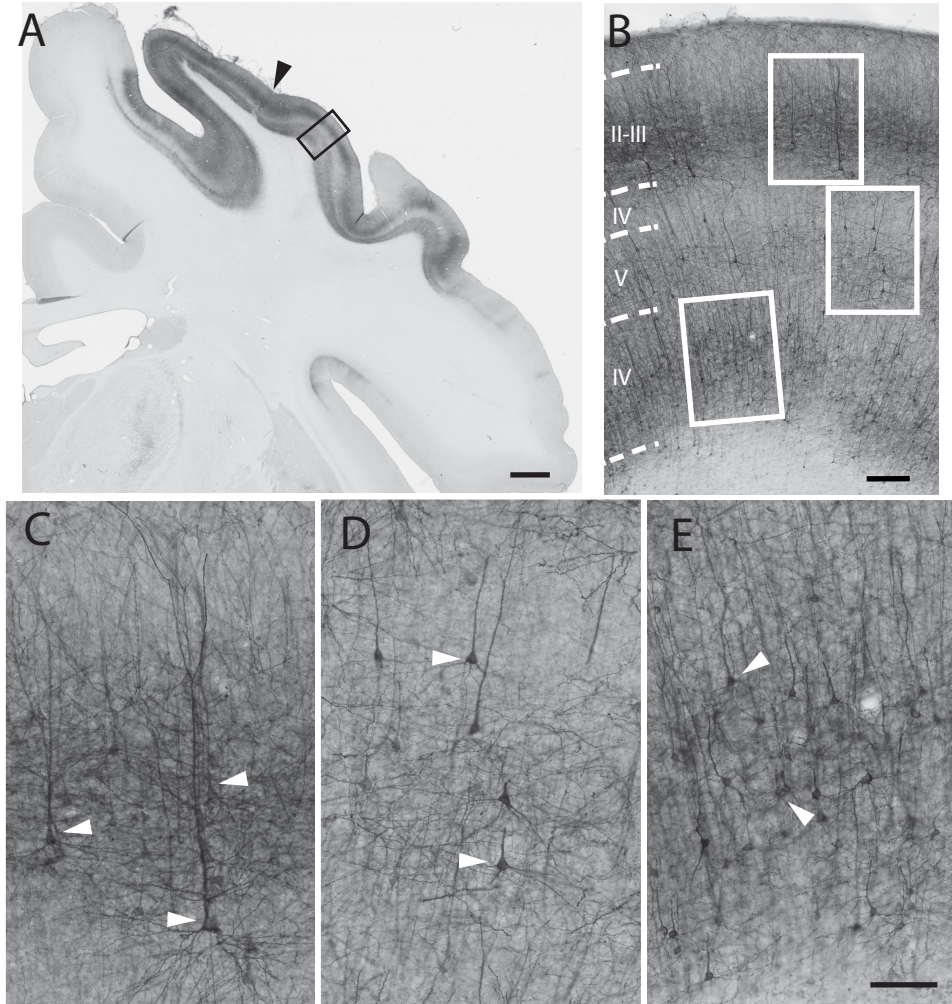

**F**

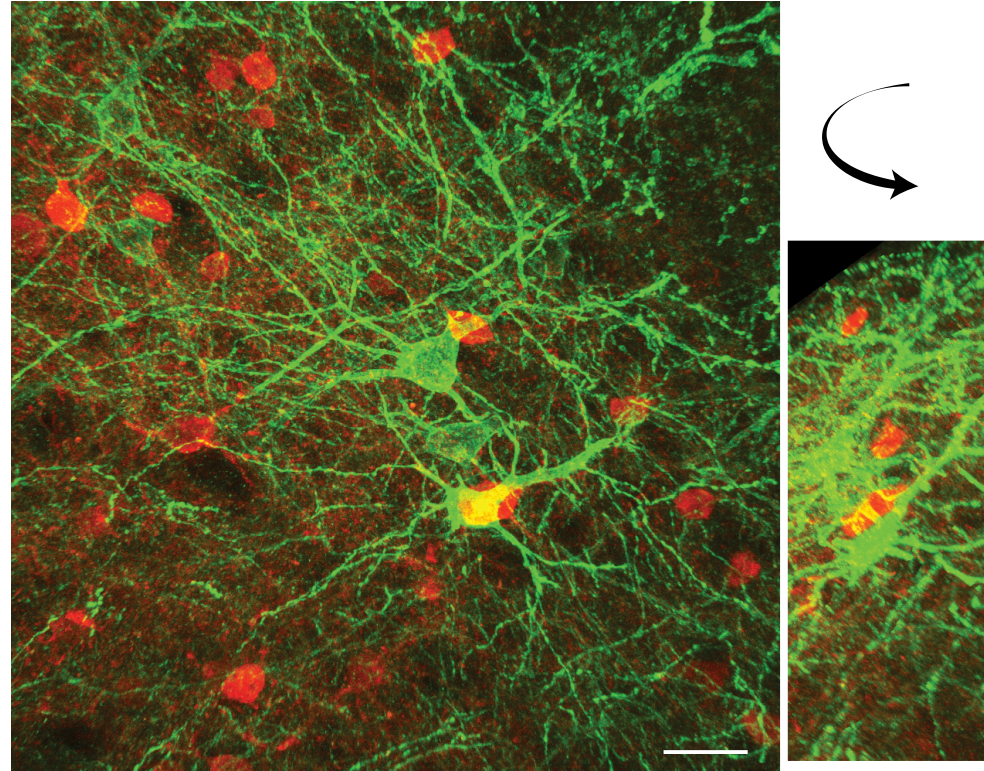

Supplement: supp [file elife-31034-supp-v1.zip]

Figure 5-Figure Supplement 1

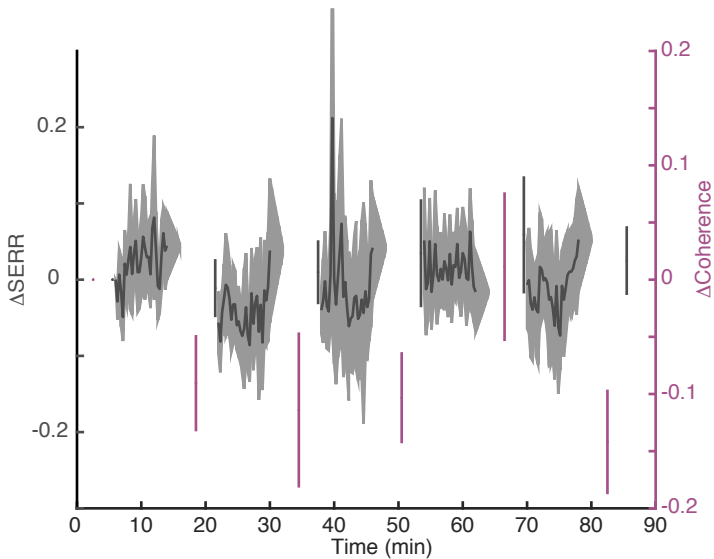

Supplement: supp [file elife-31034-supp-v1.zip]

Figure 4-Figure Supplemet 2

A

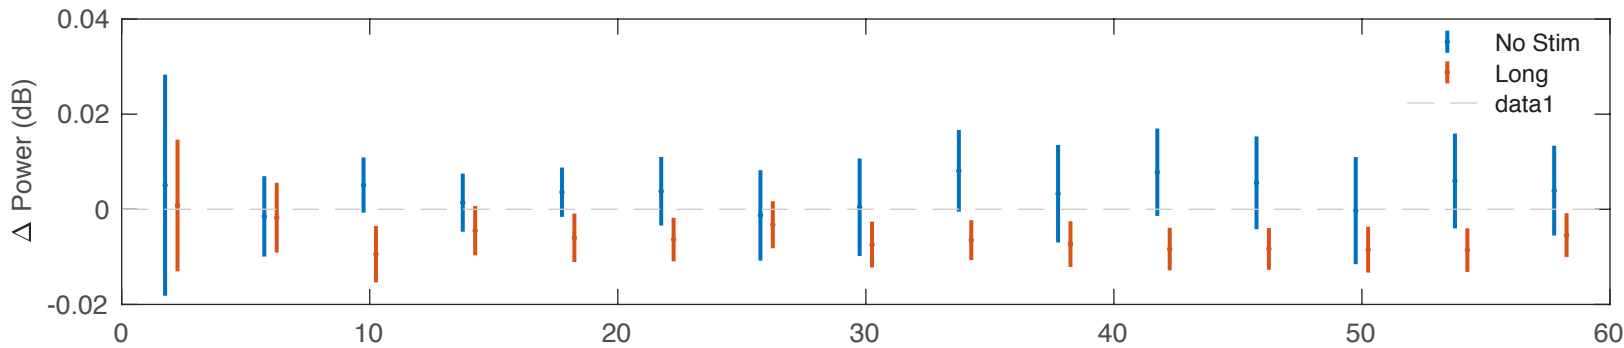

B

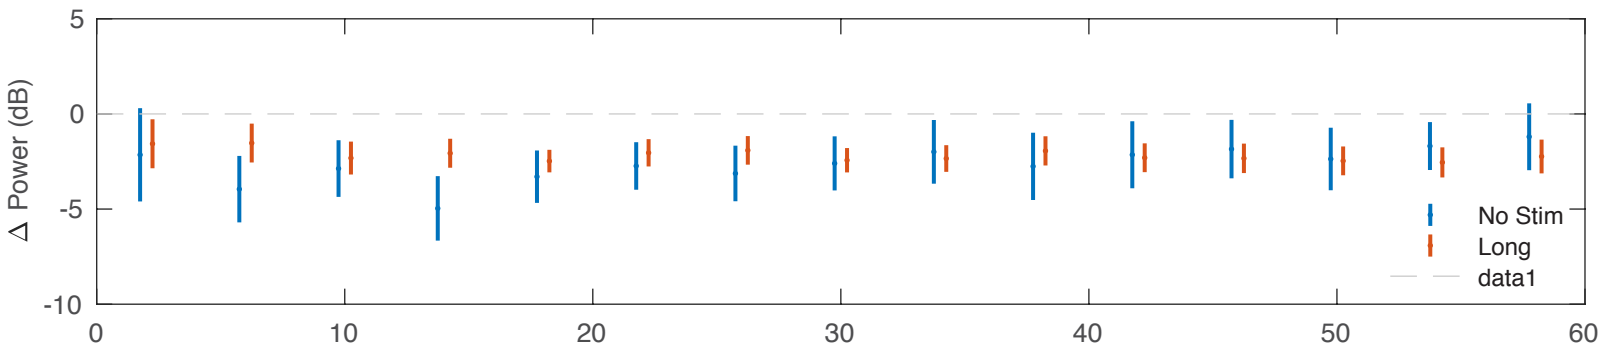

C

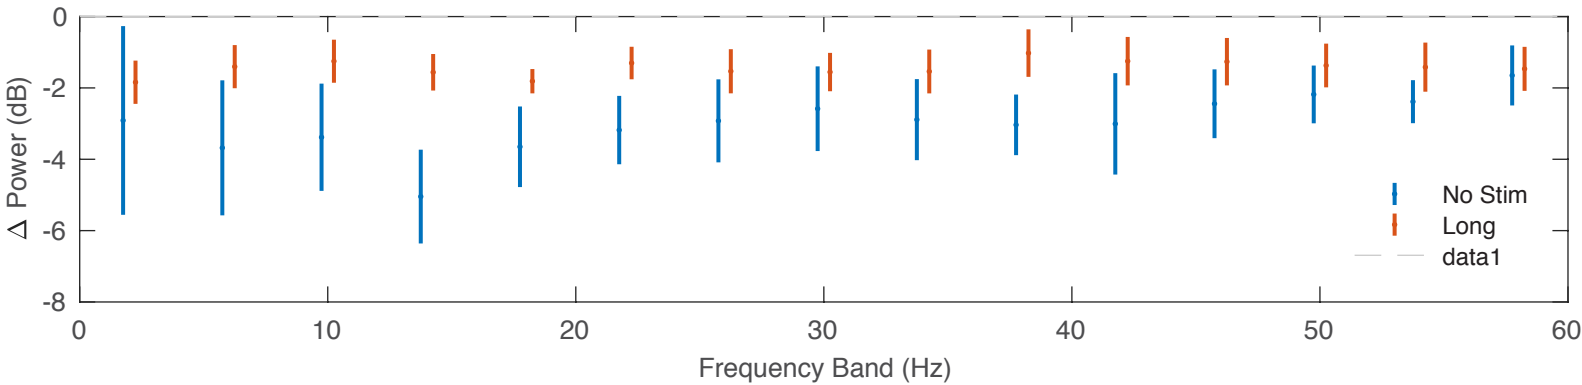

Supplement: supp [file elife-31034-supp-v1.zip]
